# Supplementary material for: A Genome-Wide Association Study to Detect QTL for Commercially Important Traits in Swiss Large White Boars
Source: PubMed Central journal article supplement (PMC3564845; doi:10.1371/journal.pone.0055951), 2013-02-05
Supplement: pone.0055951.s002.pdf [file pone.0055951.s002.pdf]

**Table S1.** Estimated Breeding values of genotyped material with their median and distribution

| <b>EBV</b>                                | <b>Units</b>    | <b>N</b> | <b>Median</b> | <b>95% LCL</b> | <b>95% UCL</b> | <b>Min</b> | <b>Max</b> |
|-------------------------------------------|-----------------|----------|---------------|----------------|----------------|------------|------------|
| <b><i>Production</i></b>                  |                 |          |               |                |                |            |            |
| daily gain on test                        | g/day           | 192      | 20.1547       | 11.6392        | 27.1212        | -71.7338   | 147.3842   |
| feed conversion                           | kg/kg           | 192      | -0.0471       | -0.0646        | -0.0336        | -0.2246    | 0.1884     |
| muscle cross section surface              | cm <sup>2</sup> | 192      | 0.1899        | -0.0296        | 0.5034         | -6.9906    | 4.7544     |
| intramuscular fat                         | %               | 192      | 0.0244        | -0.0581        | 0.0799         | -0.7051    | 0.8029     |
| pH1 post mortem                           | pH unit         | 192      | 0.0120        | 0.0030         | 0.0190         | -0.1190    | 0.1470     |
| pigmentation                              | unit            | 192      | -0.0079       | -0.0164        | 0.0016         | -0.1464    | 0.1456     |
| reflectance                               | Unigalvo unit   | 192      | 0.1528        | -0.0337        | 0.3383         | -2.5567    | 2.2353     |
| drip loss                                 | %               | 192      | -0.0643       | -0.1603        | 0.0857         | -1.0463    | 1.5417     |
| average daily gain on farm                | g/day           | 192      | 5.6959        | 2.8704         | 9.3034         | -38.2676   | 73.2584    |
| ultrasound backfat thickness              | mm              | 192      | -0.3315       | -0.4775        | -0.1995        | -3.3255    | 2.6485     |
| average daily gain of slaughter pigs      | g/day           | 192      | 7.5127        | 5.0337         | 10.7007        | -40.2963   | 80.5897    |
| lean meat content                         | %               | 192      | 0.3811        | 0.0486         | 0.6096         | -3.0364    | 3.4586     |
| <b><i>Exterieur</i></b>                   |                 |          |               |                |                |            |            |
| number of teats                           | number          | 192      | 0.0214        | -0.1316        | 0.0944         | -1.3266    | 1.5054     |
| number of inverted teats                  | number          | 192      | -0.0207       | -0.0332        | -0.0082        | -0.2602    | 0.3168     |
| rear view hind legs                       | scale 1-7       | 192      | -0.0014       | -0.0389        | 0.0331         | -0.4629    | 0.4801     |
| side view hind legs                       | scale 1-7       | 192      | 0.0008        | -0.0272        | 0.0338         | -0.3472    | 0.3498     |
| side view pastern                         | scale 1-7       | 192      | -0.0076       | -0.0531        | 0.0459         | -0.7001    | 0.6199     |
| size of inner claw                        | scale 1-7       | 192      | 0.0078        | -0.0352        | 0.0368         | -0.4602    | 0.3658     |
| side view forelegs                        | scale 1-7       | 192      | -0.0126       | -0.0271        | 0.0039         | -0.2561    | 0.5549     |
| number of bursae with subcutaneous liquid | number          | 192      | -0.0061       | -0.0956        | 0.0714         | -1.4116    | 1.4834     |
| gait                                      | scale 4-7       | 192      | -0.0114       | -0.0274        | 0.0016         | -0.2984    | 0.3086     |
| carcass length                            | cm              | 192      | 0.0980        | -0.1625        | 0.3365         | -5.2475    | 4.3535     |
| <b><i>Reproduction</i></b>                |                 |          |               |                |                |            |            |
| number born alive                         | number          | 108      | -0.1828       | -0.5133        | -0.0993        | -1.6463    | 3.0897     |
| proportion of underweight piglets         | %               | 108      | -0.1549       | -0.4309        | 0.0721         | -4.8019    | 5.8151     |
| survival rate piglets                     | %               | 108      | -0.0878       | -0.6633        | 0.5207         | -4.8983    | 5.3567     |
| interval weaning to mating                | day             | 108      | -0.0464       | -0.2924        | 0.0816         | -2.0844    | 2.9266     |
